# Supplementary material for: Effects of Simvastatin on Cartilage Homeostasis in Steroid-Induced Osteonecrosis of Femoral Head by Inhibiting Glucocorticoid Receptor
Source: MDPI journal article supplement (doi:10.3390/cells11243945), 2022-12-07
Supplement: s1 [file s1]

Supplement Table S1 Ingredient compositions and the nutrient levels of elemental diets (dry matter basis)

| Item                                   | Pre-feed<br>(from 1d to 21d) | Late feed<br>(from 22d to 56d) |
|----------------------------------------|------------------------------|--------------------------------|
| <b>Ingredients (%)</b>                 |                              |                                |
| Corn                                   | 57.00                        | 62.00                          |
| Soybean meal                           | 32.60                        | 28.00                          |
| Corn gluten meal                       | 3.00                         | 2.00                           |
| Soybean oil                            | 3.00                         | 4.00                           |
| CaHPO <sub>4</sub>                     | 2.00                         | 1.60                           |
| Limestone                              | 1.23                         | 1.30                           |
| L-Lys-HCl                              | 0.32                         | 0.31                           |
| NaCl                                   | 0.30                         | 0.30                           |
| DL-Met                                 | 0.15                         | 0.11                           |
| Premix*                                | 0.40                         | 0.38                           |
| Total                                  | 100.00                       | 100.00                         |
| <b>Nutrient levels<sup>2</sup> (%)</b> |                              |                                |
| Metabolizable Energy (MJ/kg)           | 12.55                        | 13.13                          |
| Crude Protein                          | 21.10                        | 19.57                          |
| Available Ca                           | 1.00                         | 0.93                           |
| Available P                            | 0.46                         | 0.39                           |
| Lysine                                 | 1.20                         | 1.05                           |
| Methionine                             | 0.50                         | 0.42                           |

Note: \*Per kilogram of Premix containing 12 000 IU Vitamin A, 3 000 IU Vitamin D<sub>3</sub>, 30 IU Vitamin E, 1.3 mg Vitamin K<sub>3</sub>, 0.013 mg Vitamin B<sub>12</sub>, 400 mg choline chloride, 40mg niacin, 10 mg calcium pantothenate, 8 mg riboflavin, 4 mg pyridoxine, 2.2 mg thiamine, 1 mg folic acid, 0.04 mg biotin, 110 mg manganese, 80 mg iron, 65 mg Zinc, 7.5 mg copper, 1.1 mg iodine, 0.3 mg selenium.

Supplement Table S2 Sequences of primers used to amplify specific mRNAs by qRT-PCR.

| Target gene  | Primer sequence (5'-3')          |
|--------------|----------------------------------|
| GAPDH        | Forward: GAACATCATCCCAGCGTCCA    |
|              | Reverse: CGGCAGGTCAGGTCAACAAC    |
| MMP9         | Forward: GCCATCACTGAGATCAATGGAG  |
|              | Reverse: GATAGAGAAGGCGCCCTGAGT   |
| MMP13        | Forward: AGAGACCCTGGAGCACTGATGT  |
|              | Reverse: GGGATCTCTGTCTCCAGCACCA  |
| ADAMTS4      | Forward: CAGTGGGCAGTGCGTGGATATG  |
|              | Reverse: AAGCGGTGCGTGGAGGTGAT    |
| ADAMTS5      | Forward: CGTGGTGAAGGTGGTGGTCTTG  |
|              | Reverse: GTTGTGCTGGTGCTGCCACTT   |
| IL-1 $\beta$ | Forward: GGTCAACATCGCCACCTACA    |
|              | Reverse: CATAAGAGATGCAAACCAGCAA  |
| IL-6         | Forward: TTCACCGTGTGCGAGAACAGC   |
|              | Reverse: CTGGAGAGCTTCGTCAGGCATT  |
| BMP2         | Forward: TGGTGGAGGTGGTTCACCTGGA  |
|              | Reverse: TCCCTTGCCATCATGCCCAAAC  |
| BMP3         | Forward: CTGACATTGGCTGGAGCGAGTG  |
|              | Reverse: TCTGGATGGTGGCATGGTTGGA  |
| CDMP1        | Forward: CGCCTCCAACCTGCTGTGTCC   |
|              | Reverse: TCCACCACCATGTCCTCGTACTG |
| VEGFA        | Forward: GAGTTGTCTGAAGGCTGCTCC   |
|              | Reverse: GCAACCCGCACATCTCATCA    |
| IGF-1        | Forward: GTATGTGGAGACAGAGGCTTC   |
|              | Reverse: TTTGGCATATCAGTGTGGCGC   |
| IGF-2        | Forward: CAACCGTGGCATTGTGGAGGAG  |
|              | Reverse: CGCTCTGACTTGACGGACTTGG  |

|                |                                                                    |
|----------------|--------------------------------------------------------------------|
| HIF-1 $\alpha$ | Forward: CAGCCAGGTGCCGAAGAAGC<br>Reverse: ATGGTCAGCCTCATAATGGATGCC |
| HIF-2 $\alpha$ | Forward: CTGTTGACGATGAGCAGTGCCT<br>Reverse: CCAGGTGTTGGAGCCAGTTGTG |
| collagen- II   | Forward: ACCTACAGCGTCTTGGAGGA<br>Reverse: ATATCCACGCCAAACTCCTG     |
| collagen- X    | Forward: GCCTTCCAGGTCAGCCAGGTAT<br>Reverse: TTGCCGATGCCAACTTCTCCAG |
| aggrecan       | Forward: TGCAAGGCAAAGTCTTCTACG<br>Reverse: GGCAGGGTTCAGGTAAACG     |

Supplement Table S3 The information of antibodies was used in this study.

| Antibody name      | Company     | Dilution | Catalog number |
|--------------------|-------------|----------|----------------|
| anti-col-2a1       | Beyotime    | 1:500    | AF6528         |
| anti-aggrecan      | Beyotime    | 1:500    | AF6126         |
| anti-col-10        | Beyotime    | 1:500    | AF6538         |
| anti-GAPDH         | Proteintech | 1:1000   | AF7021         |
| anti-HIF1 $\alpha$ | Beyotime    | 1:500    | AF7087         |
| anti-GR            | Wanlei      | 1:500    | WL02695        |
| anti-MMP2          | Wanlei      | 1:500    | WL03224        |
| anti-VEGF          | Beyotime    | 1:500    | AF0312         |
| anti-BMP2          | Beyotime    | 1:500    | AF0075         |
| anti-MMP13         | Wanlei      | 1:500    | WL04694        |
| anti-VHL           | Beyotime    | 1:500    | AF8328         |

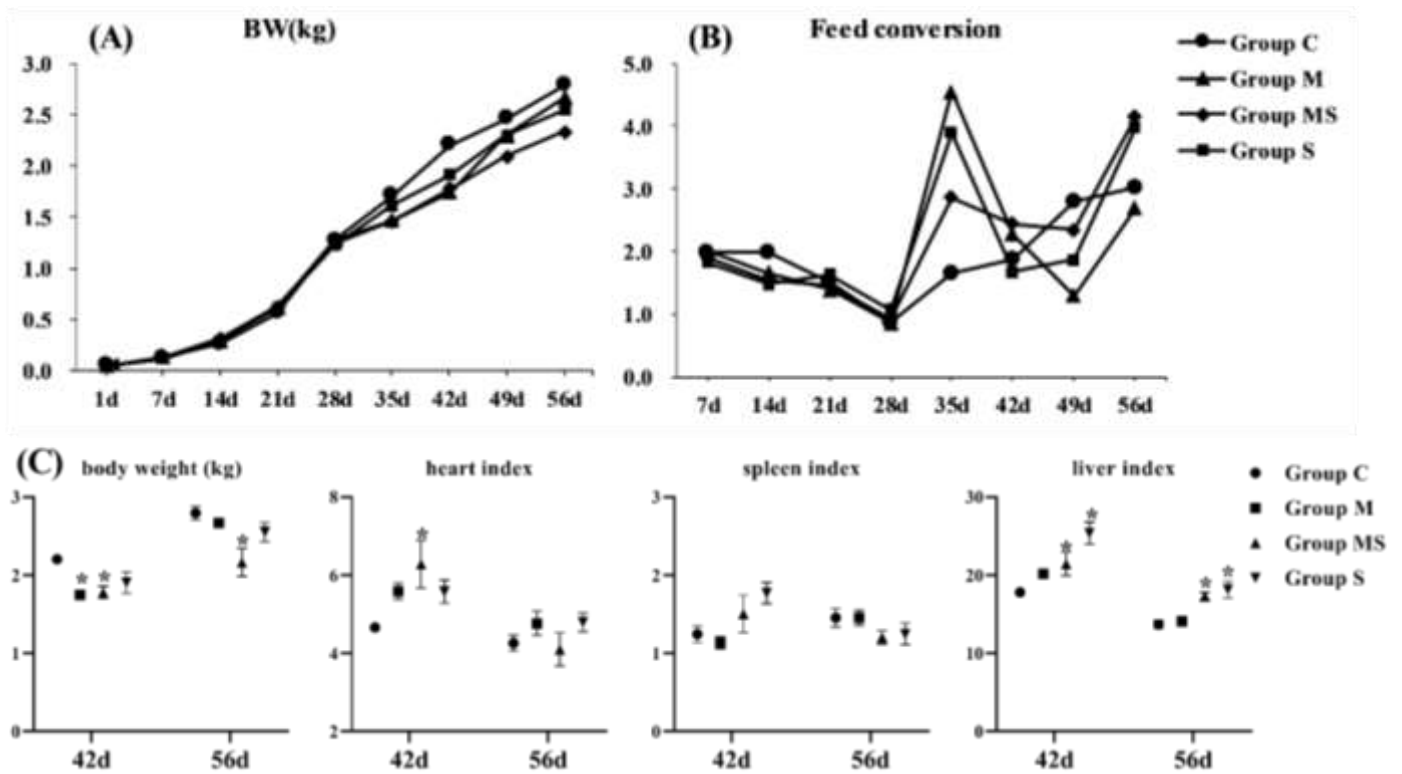

Supplement Figure S1 The physiological results of each experimental group. (A): The change of BW from day 1 to 56. (B): The trend of feed conversion at each week from day 7 to 56. (C): The changes of body weight, heart index, spleen index and liver index at the age of 42d and 56d. \*,  $p < 0.05$  vs control group.

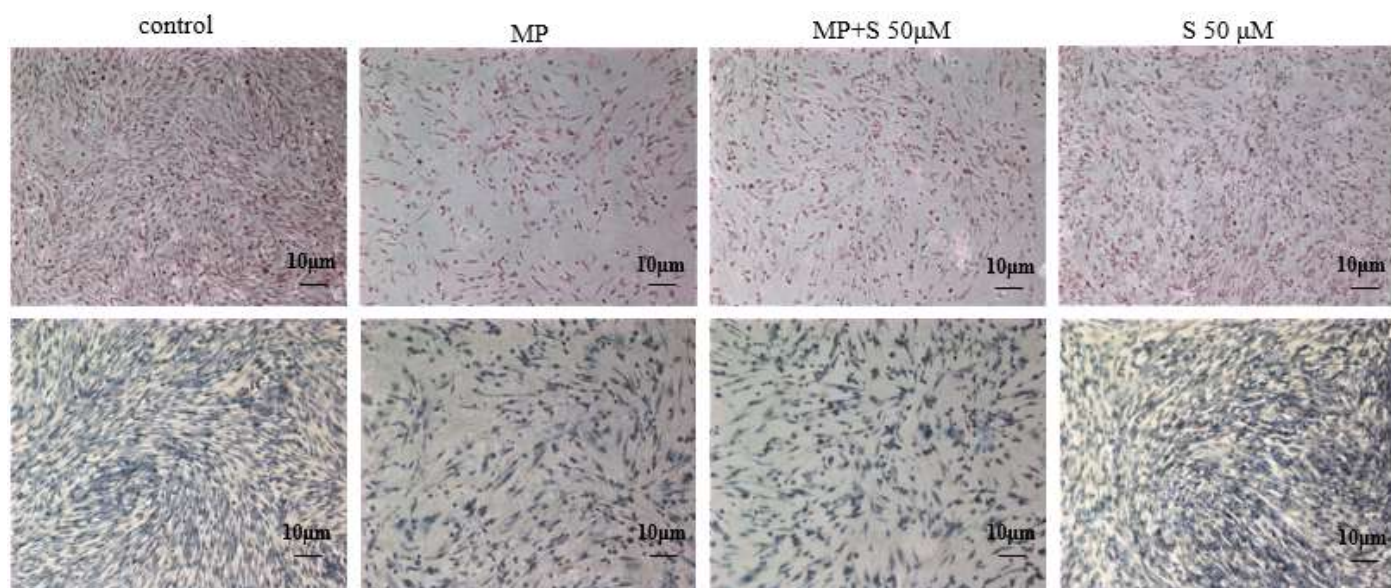

Supplement Figure S2 The toluidine blue staining and alcian blue staining of chondrocytes with different treatments.
